# Supplementary material for: Calibrating the coordination chemistry tool chest: metrics of bi- and tridentate ligands
Source: Royal Society of Chemistry journal article supplement (doi:10.1039/b904938j), 2009-01-01
Supplement: b904938j.pdf [file b904938j.pdf]

**Calibrating the Coordination Chemistry Tool Chest:  
Metrics of Bi- and Tridentate Ligands**

David Aguilà, Esther Escribano, Saskia Speed, Daniel Talancón,  
Luis Yermán, Santiago Alvarez\*

Departament de Química Inorgànica, Universitat de Barcelona  
Martí i Franquès 1-11, 08028 Barcelona

**Electronic Supplementary Information**

---

**Table S1.** Full results of the searches carried out for determining the bites of bidentate ligands. Average rigid bites (d), bite angles (a) and normalized bites (b) characteristic of bidentate ligands with donor atoms X and spacers S forming n-member chelate rings. Standard deviations given in parentheses. Number of crystallographically independent groups (CSD) from which the corresponding data were extracted, and restrictions on the R factor of the structures (when applied) are also given.

| Ligand                                        | X   | S              | n | d <sup>a</sup> | groups | $\alpha_S$ (°) | b <sub>S</sub> | groups | $\alpha_L$ (°) | b <sub>L</sub> | groups | R < |
|-----------------------------------------------|-----|----------------|---|----------------|--------|----------------|----------------|--------|----------------|----------------|--------|-----|
| 1 pyrazolato                                  | N   | -              | 3 | 1.38 (1)       | 63     | 40 (1)         | 0.68 (2)       | 2      | 38 (2)         | 0.65 (3)       | 61     | -   |
| 2 O <sub>2</sub> <sup>2-</sup>                | O   | -              | 3 | 1.45 (5)       | 419    | 42 (2)         | 0.72 (3)       | 60     | 45 (1)         | 0.76 (2)       | 359    | 10% |
| R <sub>2</sub> N-CR <sub>2</sub> <sup>-</sup> | N,C | -              | 3 | 1.44 (3)       | 70     | 37 (2)         | 0.64 (3)       | 45     | 42 (2)         | 0.71 (3)       | 25     | -   |
| 3 nitrato                                     | O   | N              | 4 | 2.13 (5)       | 1256   | 54 (5)         | 0.92 (7)       | 1097   | 53 (2)         | 0.89 (4)       | 159    | 10% |
| 4 carboxylato                                 | O   | C              | 4 | 2.19 (2)       | 1292   | 57 (4)         | 0.96 (5)       | 1196   | 57 (2)         | 0.96 (4)       | 95     | 5%  |
| 5 triazenido                                  | N   | N              | 4 | 2.09 (3)       | 60     | 58 (4)         | 0.98 (5)       | 43     | 57 (1)         | 0.96 (1)       | 17     | -   |
| 6 propanediolato                              | O   | C              | 4 | 2.26 (2)       | 33     | 60 (5)         | 1.00 (7)       | 32     |                |                |        | -   |
| 7 aminopyridine                               | N   | C              | 4 | 2.22 (3)       | 344    | 61 (4)         | 1.02 (5)       | 165    | 60 (2)         | 1.00 (3)       | 179    | 10% |
| 8 dichloromethane                             | Cl  | C              | 4 | 2.89 (3)       | 10     | 63 (3)         | 1.05 (6)       | 10     |                |                |        | -   |
| 9 amidinato                                   | N   | C              | 4 | 2.20 (3)       | 298    | 64 (2)         | 1.05 (3)       | 87     | 60 (2)         | 0.99 (3)       | 211    | 10% |
| 10 carbonato                                  | O   | C              | 4 | 2.17 (3)       | 112    | 67 (3)         | 1.10 (5)       | 95     | 60 (2)         | 1.01 (2)       | 17     | 10% |
| 11 sulfato                                    | O   | S              | 4 | 2.32 (5)       | 39     | 67 (3)         | 1.11 (5)       | 28     | 65 (2)         | 1.06 (6)       | 11     | -   |
| 12 1,1-diaminoalkane                          | N   | C              | 4 | 2.37 (4)       | 12     | 68 (2)         | 1.12 (3)       | 11     | 63 (-)         | 1.06 (-)       | 1      | -   |
| 13 pyridinethiolato                           | S,N | C              | 4 | 2.54 (4)       | 254    | 68 (3)         | 1.13 (4)       | 145    | 65 (2)         | 1.08 (2)       | 109    | 10% |
| 14 propanediyl                                | C   | C              | 4 | 2.38(12)       | 30     | 68 (1)         | 1.12 (2)       | 12     | 67 (6)         | 1.10 (9)       | 18     | -   |
| 15 dppm-                                      | P   | C              | 4 | 2.70(13)       | 12     | 71 (1)         | 1.17 (2)       | 3      | 63 (4)         | 1.04 (5)       | 6      | -   |
| 16 dppm                                       | P   | C              | 4 | 2.72 (5)       | 426    | 72 (2)         | 1.18 (2)       | 359    | 67 (2)         | 1.10 (2)       | 67     | 10% |
| 17 dithiocarbamates                           | S   | C              | 4 | 2.87 (5)       | 942    | 74 (3)         | 1.20 (4)       | 561    | 69 (2)         | 1.14 (2)       | 381    | 5%  |
| 18 1,2-dimethoxyethane                        | O   | C <sub>2</sub> | 5 | 2.66 (6)       | 129    | 75 (5)         | 1.21 (7)       | 49     | 71 (3)         | 1.16 (4)       | 80     | -   |
| 19 dpasm                                      | As  | C              | 4 | 2.89 (3)       | 2      | 75 (1)         | 1.22 (2)       | 2      |                |                |        | -   |
| 29 1,2-dichloroethane                         | Cl  | C <sub>2</sub> | 5 | 3.39 (3)       | 11     | 76 (1)         | 1.23 (1)       | 11     |                |                |        | -   |
| 21 pyrazolyl-pyridine                         | N   | C <sub>2</sub> | 5 | 2.60 (5)       | 73     | 77 (3)         | 1.25 (4)       | 72     | 75             | 1.21           | 1      | -   |
| 22 iminophosphinamidato                       | N   | P              | 4 | 2.41 (2)       | 15     | 77 (1)         | 1.25 (1)       | 3      | 67 (2)         | 1.11 (4)       | 12     | -   |
| 23 phosphinodimethylene                       | C   | P              | 4 | 2.68 (6)       | 13     | 78 (2)         | 1.26 (3)       | 11     | 69 (4)         | 1.13 (6)       | 2      | -   |
| 24 bipyridine                                 | N   | C <sub>2</sub> | 5 | 2.63 (4)       | 2967   | 78 (3)         | 1.26 (5)       | 2684   | 73 (2)         | 1.19 (4)       | 283    | 5%  |
| 25 phenanthroline                             | N   | C <sub>2</sub> | 5 | 2.68 (4)       | 2348   | 78 (4)         | 1.26 (6)       | 2226   | 73 (3)         | 1.18 (4)       | 122    | 5%  |
| 26 4,5-diazafluoren-9-one                     | N   | C <sub>2</sub> | 5 | 2.96 (7)       | 32     | 78 (4)         | 1.26 (5)       | 32     |                |                |        | -   |
| 27 quinone                                    | O   | C <sub>2</sub> | 5 | 2.59 (6)       | 50     | 81 (3)         | 1.29 (4)       | 48     | 77 (2)         | 1.25 (2)       | 2      | -   |
| 28 tropolonato <sup>g</sup>                   | O   | C <sub>2</sub> | 5 | 2.55 (4)       | 51     | 80 (5)         | 1.29 (7)       | 35     | 71 (2)         | 1.16 (4)       | 16     | -   |
| 29 dioximates                                 | N   | C <sub>2</sub> | 5 | 2.47 (3)       | 1074   | 81 (2)         | 1.30 (2)       | 1074   |                |                |        | 10% |

|    |                               |     |                |    |          |      |        |          |      |        |          |     |  |     |
|----|-------------------------------|-----|----------------|----|----------|------|--------|----------|------|--------|----------|-----|--|-----|
| 30 | C-bipyridine                  | N,C | C <sub>2</sub> | 5  | 2.64 (5) | 22   | 81 (1) | 1.29 (1) | 22   |        |          |     |  | -   |
| 31 | biphosphinine                 | P   | C <sub>2</sub> | 5  | 2.86 (6) | 26   | 81 (3) | 1.30 (4) | 21   | 74 (1) | 1.20 (1) | 2   |  | -   |
| 32 | dithiophosphinato             | S   | P              | 4  | 3.20 (4) | 50   | 82 (1) | 1.31 (1) | 25   | 79 (1) | 1.27 (1) | 25  |  | 10% |
| 33 | butanediyl                    | C   | C <sub>2</sub> | 5  | 2.78(11) | 41   | 82 (2) | 1.32 (2) | 27   | 82 (6) | 1.31 (8) | 14  |  | -   |
| 34 | oxalato                       | O   | C <sub>2</sub> | 5  | 2.60 (4) | 803  | 83 (2) | 1.32 (3) | 503  | 75 (3) | 1.21 (4) | 300 |  | 10% |
| 35 | croconato                     | O   | C <sub>2</sub> | 5  | 2.75 (6) | 37   | 82 (3) | 1.31 (4) | 35   | 77 (7) | 1.24 (1) | 2   |  | -   |
| 36 | catecholato                   | O   | C <sub>2</sub> | 5  | 2.58 (6) | 503  | 83 (3) | 1.32 (5) | 317  | 78 (2) | 1.26 (3) | 186 |  | 10% |
| 37 | ethylenediamine               | N   | C <sub>2</sub> | 5  | 2.76 (9) | 2291 | 83 (3) | 1.33 (4) | 2223 | 78 (2) | 1.26 (3) | 68  |  | 5%  |
| 38 | diars                         | As  | C <sub>2</sub> | 5  | 3.26 (6) | 101  | 85 (1) | 1.35 (2) | 71   | 75 (4) | 1.22 (5) | 30  |  | -   |
| 39 | dpae                          | As  | C <sub>2</sub> | 5  | 3.24 (6) | 18   | 85 (1) | 1.35 (1) | 12   | 82 (1) | 1.31 (1) | 6   |  | -   |
| 40 | dppe                          | P   | C <sub>2</sub> | 5  | 3.11 (9) | 1592 | 86 (3) | 1.36 (3) | 1127 | 79 (2) | 1.27 (3) | 465 |  | 5%  |
| 41 | dpp-benzene                   | P   | C <sub>2</sub> | 5  | 3.10 (8) | 141  | 86 (3) | 1.36 (4) | 113  | 78 (3) | 1.26 (4) | 28  |  | -   |
| 42 | diphosphinoethene             | P   | C <sub>2</sub> | 5  | 3.11 (9) | 100  | 86 (2) | 1.36 (3) | 82   | 78 (3) | 1.26 (4) | 18  |  | -   |
| 43 | silanedithiolato              | S   | Si             | 4  | 3.33 (8) | 3    | 88 (3) | 1.39 (4) | 2    | 87     | 1.38     | 1   |  | -   |
| 44 | dipyridylamine                | N   | CNC            | 6  | 2.87 (8) | 662  | 88 (4) | 1.39 (6) | 638  | 81 (5) | 1.30 (7) | 24  |  | 10% |
| 45 | 1,3,5-triazapenta-1,3-dienato | N   | CNC            | 6  | 2.74(14) | 36   | 90 (4) | 1.41 (4) | 36   |        |          | 1   |  | -   |
| 46 | diselenoether                 | Se  | C <sub>2</sub> | 5  | 3.54(14) | 9    | 88 (2) | 1.40 (2) | 8    | 80     | 1.28     | 1   |  | -   |
| 47 | biguanine                     | N   | CNC            | 6  | 2.76(11) | 51   | 90 (2) | 1.42 (2) | 51   |        |          |     |  | -   |
| 48 | diketonato                    | O   | C <sub>3</sub> | 6  | 2.84 (9) | 1491 | 90 (4) | 1.42 (4) | 1218 | 82 (4) | 1.32 (6) | 273 |  | 5%  |
| 49 | malonato                      | O   | C <sub>3</sub> | 6  | 2.82 (6) | 156  | 91 (2) | 1.43 (3) | 140  | 87 (2) | 1.38 (3) | 16  |  | 10% |
| 50 | propanediamine                | N   | C <sub>3</sub> | 6  | 2.93(12) | 326  | 91 (4) | 1.42 (5) | 323  | 90 (2) | 1.42 (2) | 3   |  | 10% |
| 51 | dithiolenes                   | S   | C <sub>2</sub> | 5  | 3.15(10) | 738  | 91 (2) | 1.43 (2) | 575  | 81 (2) | 1.30 (3) | 163 |  | 5%  |
| 52 | dithiooxalato                 | S   | C <sub>2</sub> | 5  | 3.20 (8) | 95   | 93 (2) | 1.43 (3) | 90   | 85 (3) | 1.35 (4) | 5   |  | -   |
| 53 | bispyrazolyl                  | N   | NBN            | 6  | 2.94(15) | 52   | 90 (4) | 1.42 (5) | 37   | 83 (4) | 1.32 (5) | 15  |  | -   |
| 54 | distibanylbenzene             | Sb  | C <sub>4</sub> | 7  | 3.62(16) | 9    | 92 (3) | 1.44 (3) |      |        |          | 9   |  | -   |
| 55 | diselenolato                  | Se  | C <sub>2</sub> | 5  | 3.39(13) | 21   | 91 (2) | 1.43 (2) | 17   | 84 (2) | 1.34 (2) | 4   |  | -   |
| 56 | binap                         | P   | C <sub>4</sub> | 7  | 3.30(11) | 124  | 92 (3) | 1.44 (3) | 123  | 92     | 1.44     | 1   |  | 10% |
| 57 | butanediamine                 | N   | C <sub>4</sub> | 7  | 2.91(12) | 9    | 93 (3) | 1.45 (4) | 9    |        |          |     |  | -   |
| 58 | dithiosquarato                | S   | C <sub>2</sub> | 5  | 3.43(10) | 22   | 93 (2) | 1.45 (3) | 22   |        |          |     |  | -   |
| 59 | dppp                          | P   | C <sub>3</sub> | 6  | 3.32(13) | 360  | 93 (4) | 1.45 (5) | 328  | 87 (2) | 1.38 (3) | 32  |  | 10% |
| 60 | diselenosquarato              | Se  | C <sub>2</sub> | 5  | 3.56     | 1    | 94     | 1.46     |      |        |          | 1   |  | -   |
| 61 | diketimate                    | N   | C <sub>3</sub> | 6  | 2.91 (8) | 500  | 94 (3) | 1.46 (4) | 392  | 87 (7) | 1.38 (9) | 108 |  | 10% |
| 62 | distibine                     | Sb  | C <sub>8</sub> | 11 | 3.90(12) | 5    | 95 (1) | 1.48 (1) | 2    | 92 (1) | 1.44 (2) | 3   |  | -   |
| 63 | propanedithiolate             | S   | C <sub>3</sub> | 6  | 3.38(12) | 41   | 96 (3) | 1.49 (4) | 6    | 91 (7) | 1.42 (8) | 35  |  | -   |

|           |                       |   |                   |    |          |     |          |           |     |         |           |    |     |
|-----------|-----------------------|---|-------------------|----|----------|-----|----------|-----------|-----|---------|-----------|----|-----|
| <b>64</b> | dppb                  | P | C <sub>4</sub>    | 7  | 3.42(11) | 70  | 96 (3)   | 1.49 (4)  | 67  | 92 (1)  | 1.44 (1)  | 3  | -   |
| <b>65</b> | dpx                   | P | C <sub>4</sub>    | 7  | 3.59(16) | 35  | 100 (7)  | 1.54 (5)  | 35  |         |           |    |     |
| <b>66</b> | dppf                  | P | FeCp <sub>2</sub> | 6  | 3.59(21) | 326 | 101 (8)  | 1.54 (7)  | 297 | 98(13)  | 1.50 (12) | 29 | 10% |
| <b>67</b> | dppr                  | P | RuCp <sub>2</sub> | 6  | 3.55(12) | 6   | 101 (4)  | 1.54 (4)  | 6   |         |           |    |     |
| <b>68</b> | squarato <sup>e</sup> | O | C <sub>2</sub>    | 5  | 3.29 (4) | 7   |          | 1.63 (1)  | 3   |         | 1.52 (1)  | 4  | -   |
| <b>69</b> | deltato               | O | C <sub>2</sub>    | 5  | 3.55     |     |          |           |     |         |           |    | -   |
| <b>70</b> | dpp-pentane           | P | C <sub>5</sub>    | 8  | 3.64(23) | 4   | 107 (10) | 1.61 (11) | 4   |         |           |    | -   |
| <b>71</b> | transphos             | P | C <sub>9</sub>    | 12 | 4.53(28) | 15  | 157 (23) | 1.92 (12) | 15  |         |           |    | -   |
| <b>72</b> | dppbp                 | P | C <sub>14</sub>   | 17 | 4.69(21) | 36  | 177 (2)  | 1.999 (1) | 17  | 167(17) | 1.97 (11) | 19 | -   |

<sup>a</sup>) Standard deviation of the sample given in parenthesis. <sup>c</sup>) o-phenylene-bis(dimethylarsine). <sup>e</sup>) Data from structures as dinucleating ligand, no chelates found. <sup>f</sup>) Only trans-chelates found. All data from CSD version 5.30 + 2 updates.

**Table S2.** Geometric parameters of the chelate rings formed by bipyridine and related ligands. Standard deviations in parentheses.

|                                 | All Metals  |           |          | Ru       |             |           |          |
|---------------------------------|-------------|-----------|----------|----------|-------------|-----------|----------|
|                                 | $\beta$ (°) | N-M-N (°) | Data Set | Ru-N (Å) | $\beta$ (°) | N-M-N (°) | Data Set |
| bipy ( <b>24</b> )              | 69 (2)      | 78 (4)    | 7109     | 2.07 (3) | 69 (1)      | 78 (1)    | 1480     |
| phen ( <b>25</b> )              | 64 (1)      | 78 (4)    | 5299     | 2.09 (3) | 65 (1)      | 79 (1)    | 261      |
| pyrazolylpyridine ( <b>21</b> ) | 59 (3)      | 78 (2)    | 8        |          |             |           |          |
| fluorenone ( <b>26</b> )        | 45 (2)      | 78 (4)    | 41       | 2.14 (1) | 49 (1)      | 81 (1)    | 5        |

**Table S3.**– Ranges of rigid bites ( $d$ ) and bite angles ( $\alpha$ ) of some long-bite bidentate ligands with donor atoms D and spacers X.

| Ligand                           | D | X                              | n  | $d$ (Å)     | $\alpha$ (°) | Fragments |
|----------------------------------|---|--------------------------------|----|-------------|--------------|-----------|
| dppf ( <b>66</b> )               | P | FeCp <sub>2</sub>              | 6  | 3.18 – 4.63 | 86 – 162     | 540       |
| dppr ( <b>67</b> )               | P | RuCp <sub>2</sub>              | 6  | 3.40 – 3.76 | 97 – 108     | 9         |
| dppp-pentane ( <b>70</b> )       | P | C <sub>5</sub>                 | 8  | 3.38 – 3.86 | 97 – 117     | 5         |
| xantphos ( <b>83</b> )           | P | C <sub>2</sub> OC <sub>2</sub> | 8  | 3.40 – 4.52 | 99 – 159     | 69        |
| bisbi ( <b>84</b> )              | P | C <sub>6</sub>                 | 9  | 3.52 – 4.56 | 100 – 165    | 14        |
| acpy2 ( <b>85</b> )              | P | C <sub>14</sub>                | 17 | 3.58 – 4.30 | 111 – 180    | 18        |
| transphos ( <b>71</b> )          | P | C <sub>9</sub>                 | 12 | 3.57 – 4.84 | 105 – 177    | 21        |
| dppbp ( <b>86</b> )              | N | C <sub>8</sub>                 | 11 | 4.41 – 4.85 | 169 – 179    | 10        |
| diisocyanomenthane ( <b>87</b> ) | C | NC <sub>5</sub> N              | 10 | 3.22 – 7.00 | -            | 67        |
| spanphos ( <b>88</b> )           | P | C <sub>5</sub> O <sub>2</sub>  | 12 | 3.50 – 4.60 | 96 – 174     | 6         |
| <b>89</b>                        | P | C <sub>14</sub> O <sub>2</sub> | 19 | 4.79        | 175          | 1         |
| <b>90</b> (n = 1)                | P | C <sub>8</sub> O <sub>3</sub>  | 14 | 4.94        | 177          | 1         |
| <b>90</b> (n = 2)                | P | C <sub>10</sub> O <sub>4</sub> | 17 | 4.94        | 172          | 1         |
| <b>90</b> (n = 3)                | P | C <sub>12</sub> O <sub>5</sub> | 20 | 4.95        | 174          | 1         |

**Table S4** – Parameters for ligands in bidentate and binucleating coordination modes.

| Ligand                         | D   | X              | Bidentate    |           | Binucleating |           | Data Sets | R     |
|--------------------------------|-----|----------------|--------------|-----------|--------------|-----------|-----------|-------|
|                                |     |                | <i>d</i> (Å) | D-X-D (°) | <i>d</i> (Å) | D-X-D (°) |           |       |
| <b>1</b> pyrazolato            | N   | -              | 1.38 (1)     |           | 1.37 (3)     |           | 155       |       |
| <b>3</b> nitrato               | O   | N              | 2.13 (5)     | 116 (3)   | 2.21 (8)     | 122 (2)   | 14        |       |
| <b>4</b> carboxylato           | O   | C              | 2.19 (2)     | 121 (2)   | 2.24 (2)     | 125 (2)   | 1803      | < 5%  |
| <b>5</b> triazenido            | N   | N              | 2.09 (3)     | 106 (3)   | 2.20 (3)     | 115 (2)   | 94        |       |
| <b>7</b> aminopyridine         | N   | C              | 2.22 (3)     | 109 (2)   | 2.32 (3)     | 116 (2)   | 308       | < 10% |
| <b>9</b> amidinato             | N   | C              | 2.20 (3)     | 112 (2)   | 2.31 (3)     | 121 (2)   | 683       | < 10% |
| <b>10</b> carbonato            | O   | C              | 2.17 (3)     | 111 (2)   | 2.25 (1)     | 120 (2)   | 11        |       |
| <b>11</b> sulfato              | O   | S              | 2.32 (5)     | 100 (3)   | 2.46 (2)     | 108 (2)   | 12        |       |
| <b>13</b> pyridinethiolato     | S,N | C              | 2.55 (4)     | 110 (3)   | 2.69 (5)     | 119 (4)   | 158       | < 10% |
| <b>16</b> dppm                 | P   | C              | 2.72 (5)     | 95 (2)    | 3.04 (6)     | 112 (3)   | 1230      | < 10% |
| <b>17</b> dithiocarbamates     | S   | C              | 2.87 (5)     | 113 (3)   | 3.04 (6)     | 126 (5)   | 40        |       |
| <b>19</b> dpasm                | As  | C              | 2.89 (3)     | 94 (2)    | 3.22 (8)     | 111 (4)   | 19        |       |
| <b>23</b> phosphinodimethylene | C   | P              | 2.68 (6)     | 100 (3)   | 2.85 (6)     | 108 (3)   | 38        |       |
| <b>24</b> bipy                 | N   | C <sub>2</sub> | 2.63 (4)     | -         | 2.78 (8)     | -         | 14        |       |
| <b>32</b> dithiophosphinato    | S   | P              | 3.20 (4)     | 106 (3)   | 3.38 (5)     | 114 (3)   | 12        |       |
| <b>37</b> ethylenediamine      | N   | C <sub>2</sub> | 2.76 (9)     | -         | 3.3 (3)      | -         | 3         |       |
| <b>59</b> dppp                 | P   | C <sub>3</sub> | 3.3 (1)      | -         | 4.5 (2)      | -         | 28        |       |
| <b>64</b> dppb                 | P   | C <sub>4</sub> | 3.4 (1)      | -         | 5.1 (1)      | -         | 7         |       |
| <b>68</b> squarato             | O   | C <sub>2</sub> |              | -         | 3.29 (4)     | -         | 6         |       |

All data from CSD version 5.30 + 2 updates.

**Table S5** – Pyramidalities ( $\Sigma$ ), average angle between DMD chelate rings ( $\beta$ ) and normalized bites ( $b$ ) for some common tridentate ligands with large (L) and small (S) transition metal ions, according to the classification of Figure 2. Standard deviations given in parentheses, and size of the data sets from which the parameters have been extracted are also given.

| Abbreviaton                                    | Ligand                                            | $\beta_L$ | $\beta_S$ | $\Sigma_L$ | $\Sigma_S$ | $b_L$    | $b_S$    | Data Set L | Data Set S |
|------------------------------------------------|---------------------------------------------------|-----------|-----------|------------|------------|----------|----------|------------|------------|
| <b>Crown ligands</b> ( <i>only fac</i> ):      |                                                   |           |           |            |            |          |          |            |            |
| Cp                                             | $\eta^5$ -cyclopentadienide                       |           |           | 152 (7)    | 178 (8)    |          |          | 10000      | 10000      |
| tach                                           | triazacyclohexane ( <b>91</b> ) †                 | 70 (1)    | 72 (1)    | 179 (4)    | 189 (6)    | 1.00(2)  | 1.05 (3) | 28         | 41         |
| ttch                                           | trithiacyclohexane †                              |           | 72 (-)    |            | 189 (-)    |          | 1.04 (-) |            | 1          |
| Ar                                             | arene ( $C_6R_6$ )                                |           |           | 187(13)    | 197 (9)    |          |          | 438        | 5348       |
| tacn                                           | triazacyclononane ( <b>92</b> ) †                 | 79 (2)    | 83 (2)    | 228 (9)    | 246 (8)    | 1.23 (4) | 1.31 (4) | 219        | 911        |
| chta                                           | cyclohexanetriamine ( <b>93</b> ) †               | 85 (4)    | 87 (2)    | 264(19)    | 271 (9)    | 1.39 (8) | 1.42 (4) | 7          | 126        |
| ttcn                                           | trithiacyclononane ( <b>95</b> ) †                | 82 (3)    | 87 (2)    | 242(14)    | 262 (8)    | 1.29 (6) | 1.38 (3) | 20         | 257        |
| tpcn                                           | triphosphacyclononane ( <b>94</b> ) †             |           | 86 (1)    |            | 257 (1)    |          | 1.36 (1) |            | 5          |
| tacd                                           | triazacyclodecane ( <b>96</b> ) †                 | -         | 84 (2)    |            | 264(13)    |          | 1.39 (5) |            | 20         |
| ttcd                                           | trithiacyclodecane †                              | 84 (-)    | 86 (1)    | 254 (-)    | 269 (6)    | 1.35 (-) | 1.41 (2) | 1          | 18         |
| tpcd                                           | triphosphacyclodecane †                           |           | 87 (1)    |            | 262 (1)    |          | 1.38 (1) |            | 3          |
| toch                                           | trisoxocyclohexane ( <b>97</b> ) †                | 82 (6)    | 88 (1)    | 244(27)    | 265 (6)    | 1.30(12) | 1.40 (3) | 17         | 19         |
| tacdd                                          | triazacyclododecane ( <b>98</b> ) †               | 81 (3)    | 80 (9)    | 246 (7)    | 292(16)    | 1.31 (3) | 1.50 (6) | 2          | 30         |
| ttcdd                                          | trithiacyclododecane * ( <b>99</b> ) †            |           | 78(11)    |            | 296(21)    |          | 1.51 (8) |            | 7          |
| tpcd                                           | triphosphacyclododecane ( <b>100</b> ) †          | 88 (2)    | 84(8)     | 264 (7)    | 285(18)    | 1.47 (7) | 1.51 (8) | 13         | 12         |
| <b>Triskelion ligands</b> ( <i>only fac</i> ): |                                                   |           |           |            |            |          |          |            |            |
| tppm                                           | HC(PPh <sub>2</sub> ) <sub>3</sub> ( <b>101</b> ) |           | 76        |            | 216        |          | 1.18     |            | 1          |
| tpm                                            | tris(pyrazolyl)methane ( <b>102</b> )             | 81 (2)    | 85 (2)    | 239 (2)    | 254 (6)    | 1.28 (4) | 1.34 (3) | 22         | 80         |
| tpym                                           | tris(pyridyl)methane ( <b>103</b> ) †             | 83 (1)    | 87 (2)    | 246 (3)    | 260 (7)    | 1.31 (2) | 1.37 (3) | 3          | 37         |
| tpb                                            | tris(pyrazolyl)borate ( <b>104</b> )              | 82 (2)    | 86 (2)    | 244 (8)    | 265(10)    | 1.30 (4) | 1.39 (4) | 571        | 1082       |
| timyb                                          | tris(imidazol-2-ylidene)borate ( <b>105</b> ) †   | -         | 88 (1)    | -          | 271 (5)    | -        | 1.42 (2) | -          | 12         |

|                                                          |                                                                  |            |         |        |         |         |          |          |    |     |
|----------------------------------------------------------|------------------------------------------------------------------|------------|---------|--------|---------|---------|----------|----------|----|-----|
| taea                                                     | RC(CH <sub>2</sub> NR <sub>2</sub> ) <sub>3</sub> ( <b>106</b> ) |            | 82      | 88 (1) | 246     | 264 (3) | 1.31     | 1.39 (1) | 1  | 20  |
| tppe                                                     | tris(diphenylphosphinomethyl)ethane ( <b>107</b> )               |            | 85 (2)  | 88 (1) | 253 (7) | 271 (7) | 1.34 (3) | 1.42 (3) | 48 | 208 |
| tpmb                                                     | tris(phosphinomethyl)borate ( <b>108</b> ) †                     |            | -       | 87 (2) | -       | 275 (8) | -        | 1.43 (3) | -  | 127 |
| ttmb                                                     | tris(alkylthiomethyl)borate ( <b>109</b> )                       |            | 84      | 85 (2) | 250     | 277(12) | 1.33     | 1.44 (5) | 2  | 26  |
| tip                                                      | tris(imidazolyl)phosphine ( <b>110</b> )                         |            | 82      | 85 (2) | 244     | 279(10) | 1.30     | 1.45 (4) | 2  | 16  |
| tpmo                                                     | tris(diphenylphosphine oxide)methane ( <b>111</b> )              |            | -       | 88 (1) | -       | 267 (1) | -        | 1.40 (1) | -  | 9   |
| <b>Clamp ligands</b> ( <i>mer</i> coordination):         |                                                                  |            |         |        |         |         |          |          |    |     |
|                                                          | Bis(4'-phenyloxazolin-2'-yl)pyridine ( <b>112</b> )              |            |         | 1 (1)  |         |         |          | 1.23 (4) |    | 64  |
| terpy                                                    | terpyridine ( <b>113</b> )                                       |            | 10 (12) | 3 (4)  |         |         | 1.13 (8) | 1.25 (4) | 62 | 916 |
| dpzpy                                                    | dipyrazolylpyridine ( <b>114</b> )                               |            | 4       | 3 (3)  |         |         | 1.26 (x) | 1.25 (4) | 1  | 102 |
|                                                          | NCN pincer ( <b>115</b> ) †                                      |            | 4 (3)   | 2 (3)  | -       | -       | 1.18 (2) | 1.31 (2) | 5  | 193 |
|                                                          | PCP pincer †                                                     |            | -       | 17 (5) | -       | -       | -        | 1.32 (2) | -  | 146 |
|                                                          | NCN pincer ( <i>fac</i> coordination) †                          |            | 54 (5)  |        | -       | -       | 1.16 (1) |          | 5  |     |
| <b>Ribbon ligands</b> (both <i>fac</i> and <i>mer</i> ): |                                                                  |            |         |        |         |         |          |          |    |     |
| dien                                                     | diethylenetriamine ( <b>116</b> )                                | <i>fac</i> | 83 (5)  | 84(7)  | 244(10) | 260 (6) | 1.25 (4) | 1.32(4)  | 38 | 171 |
|                                                          |                                                                  | <i>mer</i> | 18 (5)  | 23 (4) | 311(15) | 329(11) | 1.27(3)  | 1.32(4)  | 6  | 165 |
| dptn                                                     | bis(aminopropyl)amine ( <b>117</b> )                             | <i>fac</i> |         | -      |         | 297(18) | -        | 1.47 (4) | -  | 8   |
|                                                          |                                                                  | <i>mer</i> |         |        |         | 353 (8) | -        | 1.46 (3) | -  | 86  |
| bpea                                                     | bis(pyridylethyl)amine ( <b>118</b> )                            | <i>fac</i> | -       | 74(11) | -       | 299(12) | -        | 1.51 (2) | -  | 17  |
|                                                          |                                                                  | <i>mer</i> | -       | 9 (8)  | -       | 355 (6) | -        | 1.50 (7) | -  | 24  |

† Data from the CSD version 5.30 + 2 updates (February 2009); all other data from CSD version 5.29.
